# Supplementary material for: Antibiotic Resistance of Haemophilus influenzae in Nasopharyngeal Carriage of Children with Acute Otitis Media and in Middle Ear Fluid from Otorrhea
Source: MDPI journal article supplement (doi:10.3390/antibiotics12111605), 2023-11-08
Supplement: s1 [file s1]

## Supplementary Data

**Table S1:** Estimation of the impact of non-pharmaceutical intervention implementation on *H. influenzae* nasopharyngeal carriage.

|                                         | Period 1                     |        | Period 2                     |        | Period 3                     |        | Period 4                        |        |                              |        |
|-----------------------------------------|------------------------------|--------|------------------------------|--------|------------------------------|--------|---------------------------------|--------|------------------------------|--------|
|                                         | Monthly trend, %<br>(95% CI) | Pvalue | Monthly trend, %<br>(95% CI) | Pvalue | Monthly trend, %<br>(95% CI) | Pvalue | Immediate change, %<br>(95% CI) | Pvalue | Monthly trend, %<br>(95% CI) | Pvalue |
| <b>Overall Hi carriage</b>              | 0.0 (-0.3 to 0.3)            | .99    | 0.1 (-0.3 to 0.4)            | .65    | 0.1 (-0.9 to 1.2)            | .77    | -67.4 (-99.5 to -35.3)          | <.001  | 1.9 (0.6 to 3.2)             | .005   |
| <b>β-lactamase-producing Hi strains</b> | -0.4 (-0.9 to 0.1)           | .13    | 0.3 (-0.1 to 0.6)            | .11    | -0.3 (-0.9 to 0.3)           | .35    | -57.6 (-100 to 44.3)            | .26    | 1.7 (-0.9 to 4.2)            | .20    |
| <b>BLNAR Hi strains</b>                 | 0.4 (-0.3 to 1.1)            | .28    | -0.4 (-1.0 to 0.2)           | .18    | 1.0 (-0.3 to 2.2)            | .12    | -6.7 (-100 to 91.1)             | .89    | 0.7 (-30.7 to 32.0)          | .97    |

Notes: estimations based on the segmental linear regression model with autoregressive error.

Period 1, November 2006 to October 2011; Period 2, November 2011 to May 2017; Period 3, June 2017 to March 2020; and Period 4, April 2020 to July 2022

Abbreviation: CI, confidence interval; Hi, *Haemophilus influenzae*; BLNAR, β-lactamase-negative, ampicillin-resistant.
